# Supplementary material for: Phosphine containing dendrimers for highly regioselective rhodium catalysed hydroformylation of alkenes: a positive ‘dendritic effect’
Source: Royal Society of Chemistry journal article supplement (doi:10.1039/b206597e), 2002-01-01
Supplement: b206597e-2.pdf [file b206597e-2.pdf]

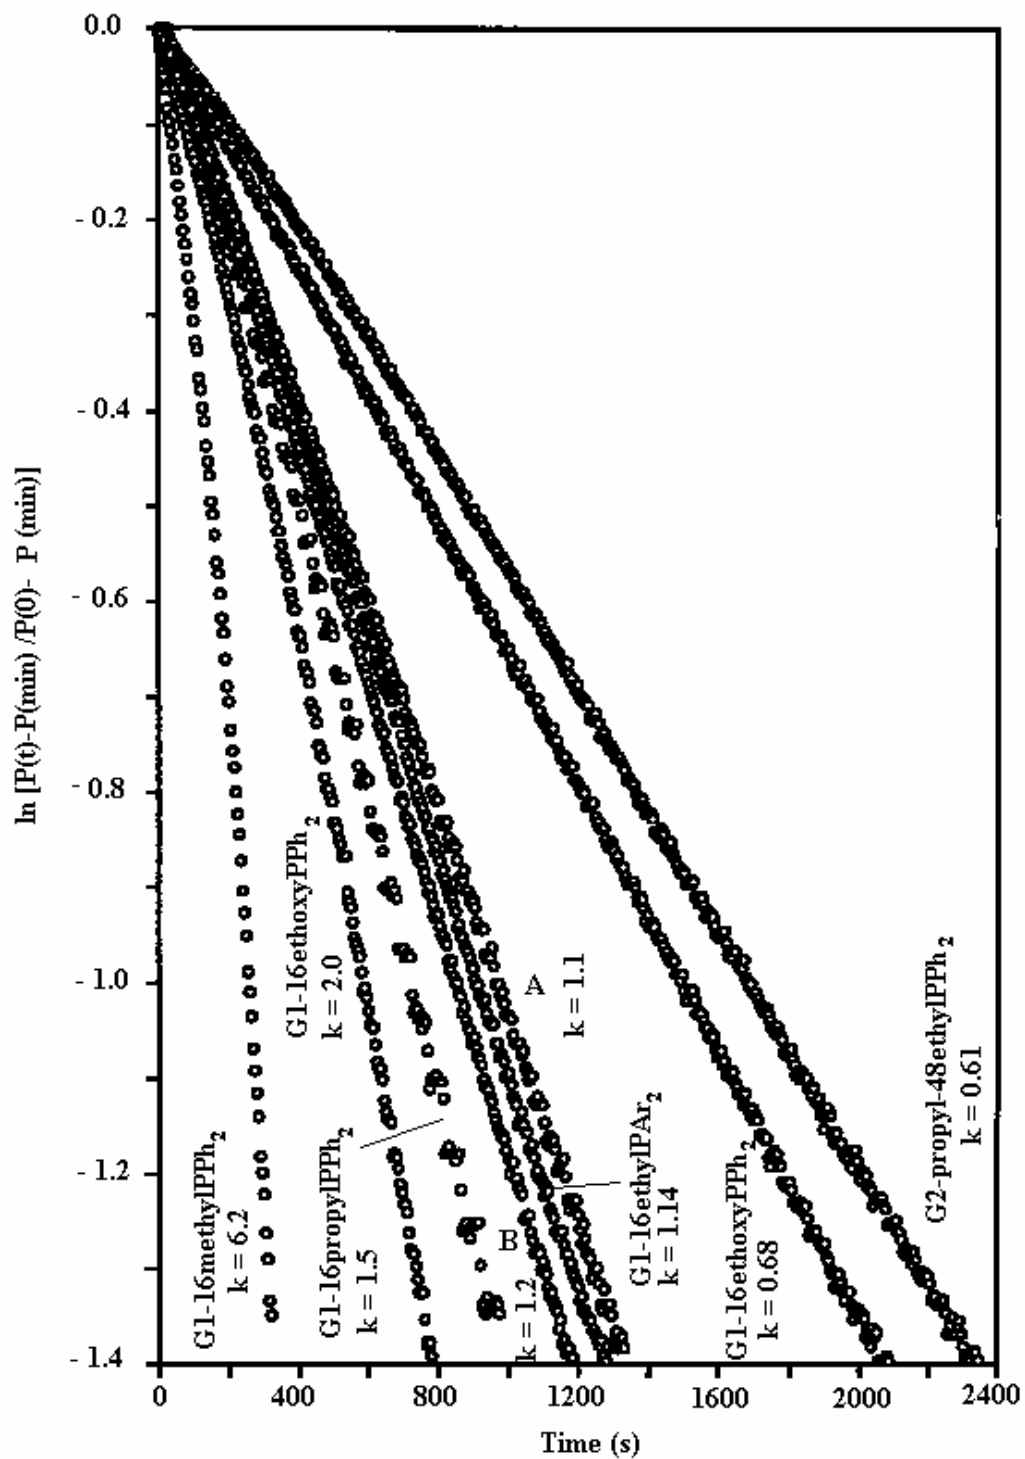

Fig. S2 Effect of the dendrimer structure on the rate of hydroformylation of oct-1-ene ( $k$  in  $10^{-3} \text{ s}^{-1}$ ) ( $[\text{Rh}] = 3.77 \times 10^{-3} \text{ mol} \cdot \text{dm}^{-3}$ ,  $P/\text{Rh} = 5.4/1$ ,  $\text{H}_2/\text{CO}$  10 bar,  $120^\circ\text{C}$ ).
